# Supplementary material for: Multiblock Parameter Calibration in Computer Models
Source: Atypon-hosted journal article supplement (doi:10.1287/ijds.2023.0029), 2023-05-12
Supplement: ijds.2023.0029.sm1.pdf [file ijds.2023.0029.sm1.pdf]

## Online Supplementary Document:

### “Multi-block Parameter Calibration in Computer Models”

Cheoljoon Jeong, Ziang Xu, Albert S. Berahas, Eunshin Byon, and Kristen Cetin

#### 1 Proof for Lemma 1

After the  $M_b$  iterations for the  $b^{th}$  block optimization (inner iteration) at the  $(k+1)^{th}$  outer iteration, the iterate for the  $b^{th}$  block parameter is updated from  $\boldsymbol{\theta}_b^k$  to  $\boldsymbol{\theta}_b^{k+1}$ . By  $L_b$ -Lipschitz continuous gradient and  $\alpha_b \in (0, 1/L_b]$ , we have

$$\begin{aligned}
 & F_b(\boldsymbol{\theta}_b^{k, M_b+1}; \boldsymbol{\theta}_{-b}^{k+1}) \\
 & \leq F_b(\boldsymbol{\theta}_b^{k, M_b}; \boldsymbol{\theta}_{-b}^{k+1}) + \nabla F_b(\boldsymbol{\theta}_b^{k, M_b}; \boldsymbol{\theta}_{-b}^{k+1})^T (\boldsymbol{\theta}_b^{k, M_b+1} - \boldsymbol{\theta}_b^{k, M_b}) + \frac{1}{2} L_b \|\boldsymbol{\theta}_b^{k, M_b+1} - \boldsymbol{\theta}_b^{k, M_b}\|_2^2 \\
 & = F_b(\boldsymbol{\theta}_b^{k, M_b}; \boldsymbol{\theta}_{-b}^{k+1}) - \alpha_b \|\nabla F_b(\boldsymbol{\theta}_b^{k, M_b}; \boldsymbol{\theta}_{-b}^{k+1})\|_2^2 + \frac{1}{2} \alpha_b^2 L_b \|\nabla F_b(\boldsymbol{\theta}_b^{k, M_b}; \boldsymbol{\theta}_{-b}^{k+1})\|_2^2 \\
 & \leq F_b(\boldsymbol{\theta}_b^{k, M_b}; \boldsymbol{\theta}_{-b}^{k+1}) - \frac{1}{2} \alpha_b \|\nabla F_b(\boldsymbol{\theta}_b^{k, M_b}; \boldsymbol{\theta}_{-b}^{k+1})\|_2^2 \\
 & \leq F_b(\boldsymbol{\theta}_b^{k, M_b-1}; \boldsymbol{\theta}_{-b}^{k+1}) + \nabla F_b(\boldsymbol{\theta}_b^{k, M_b-1}; \boldsymbol{\theta}_{-b}^{k+1})^T (\boldsymbol{\theta}_b^{k, M_b} - \boldsymbol{\theta}_b^{k, M_b-1}) \\
 & \quad + \frac{1}{2} L_b \|\boldsymbol{\theta}_b^{k, M_b} - \boldsymbol{\theta}_b^{k, M_b-1}\|_2^2 - \frac{1}{2} \alpha_b \|\nabla F_b(\boldsymbol{\theta}_b^{k, M_b}; \boldsymbol{\theta}_{-b}^{k+1})\|_2^2 \tag{A.1} \\
 & \leq F_b(\boldsymbol{\theta}_b^{k, M_b-1}; \boldsymbol{\theta}_{-b}^{k+1}) - \alpha_b \|\nabla F_b(\boldsymbol{\theta}_b^{k, M_b-1}; \boldsymbol{\theta}_{-b}^{k+1})\|_2^2 + \frac{1}{2} \alpha_b^2 L_b \|\nabla F_b(\boldsymbol{\theta}_b^{k, M_b-1}; \boldsymbol{\theta}_{-b}^{k+1})\|_2^2 \\
 & \quad - \frac{1}{2} \alpha_b \|\nabla F_b(\boldsymbol{\theta}_b^{k, M_b}; \boldsymbol{\theta}_{-b}^{k+1})\|_2^2 \\
 & \leq \dots \\
 & \leq F_b(\boldsymbol{\theta}_b^{k, 1}; \boldsymbol{\theta}_{-b}^{k+1}) - \frac{1}{2} \alpha_b \sum_{m=1}^{M_b} \|\nabla F_b(\boldsymbol{\theta}_b^{k, m}; \boldsymbol{\theta}_{-b}^{k+1})\|_2^2.
 \end{aligned}$$

With  $F_b(\boldsymbol{\theta}_b^{k,1}; \boldsymbol{\theta}_{-b}^{k+1}) = F_b(\boldsymbol{\theta}_b^k; \boldsymbol{\theta}_{-b}^{k+1})$  and  $F_b(\boldsymbol{\theta}_b^{k,M_b+1}; \boldsymbol{\theta}_{-b}^{k+1}) = F_b(\boldsymbol{\theta}_b^{k+1}; \boldsymbol{\theta}_{-b}^{k+1})$ , the following inequality holds.

$$F_b(\boldsymbol{\theta}_b^{k+1}; \boldsymbol{\theta}_{-b}^{k+1}) \leq F_b(\boldsymbol{\theta}_b^k; \boldsymbol{\theta}_{-b}^{k+1}) - \frac{1}{2}\alpha_b \sum_{m=1}^{M_b} \|\nabla F_b(\boldsymbol{\theta}_b^{k,m}; \boldsymbol{\theta}_{-b}^{k+1})\|_2^2, \quad (\text{A.2})$$

for  $b = 1, 2, \dots, B$ .

□

## 2 Proof for Theorem 1

By Lemma 1, we have

$$F_b(\boldsymbol{\theta}_b^k; \boldsymbol{\theta}_{-b}^{k+1}) - F_b(\boldsymbol{\theta}_b^{k+1}; \boldsymbol{\theta}_{-b}^{k+1}) \geq \frac{1}{2}\alpha_b \sum_{m=1}^{M_b} \|\nabla F_b(\boldsymbol{\theta}_b^{k,m}; \boldsymbol{\theta}_{-b}^{k+1})\|_2^2. \quad (\text{A.3})$$

By the conditions in (16),

$$\begin{aligned} F_b(\boldsymbol{\theta}^k) - F_b(\boldsymbol{\theta}^{k+1}) &\geq F_b(\boldsymbol{\theta}_b^k; \boldsymbol{\theta}_{-b}^{k+1}) - F_b(\boldsymbol{\theta}_b^{k+1}; \boldsymbol{\theta}_{-b}^{k+1}) \\ &\geq \frac{1}{2}\alpha_b \sum_{m=1}^{M_b} \|\nabla F_b(\boldsymbol{\theta}_b^{k,m}; \boldsymbol{\theta}_{-b}^{k+1})\|_2^2. \end{aligned} \quad (\text{A.4})$$

Summing over  $k \in \{0, 1, \dots, K\}$ , by the telescopic sum, it follows that

$$F_b(\boldsymbol{\theta}^0) - F_b(\boldsymbol{\theta}^{K+1}) \geq \frac{1}{2}\alpha_b \sum_{k=0}^K \sum_{m=1}^{M_b} \|\nabla F_b(\boldsymbol{\theta}_b^{k,m}; \boldsymbol{\theta}_{-b}^{k+1})\|_2^2. \quad (\text{A.5})$$

Taking  $K \rightarrow \infty$ , and by the conditions in (16), we have

$$\infty > F_b(\boldsymbol{\theta}^0) - F_b^{\text{inf}} \geq \frac{1}{2}\alpha_b \sum_{k=0}^{\infty} \sum_{m=1}^{M_b} \|\nabla F_b(\boldsymbol{\theta}_b^{k,m}; \boldsymbol{\theta}_{-b}^{k+1})\|_2^2. \quad (\text{A.6})$$

The above inequality implies

$$\|\nabla F_b(\boldsymbol{\theta}_b^k; \boldsymbol{\theta}_{-b}^{k+1})\|_2^2 \rightarrow 0 \quad \text{as } k \rightarrow \infty. \quad (\text{A.7})$$

□

### 3 Proof for Corollary 1

By Lemma 1, we have

$$F_b(\boldsymbol{\theta}_b^k; \boldsymbol{\theta}_{-b}^{k+1}) - F_b(\boldsymbol{\theta}_b^{k+1}; \boldsymbol{\theta}_{-b}^{k+1}) \geq \frac{1}{2} \alpha_b \sum_{m=1}^{M_b} \|\nabla F_b(\boldsymbol{\theta}_b^{k,m}; \boldsymbol{\theta}_{-b}^{k+1})\|_2^2. \quad (\text{A.8})$$

Summing over  $k \in \{0, 1, \dots, K\}$  on both sides, it follows that

$$\sum_{k=0}^K \{F_b(\boldsymbol{\theta}_b^k; \boldsymbol{\theta}_{-b}^{k+1}) - F_b(\boldsymbol{\theta}_b^{k+1}; \boldsymbol{\theta}_{-b}^{k+1})\} \geq \frac{1}{2} \alpha_b \sum_{k=0}^K \sum_{m=1}^{M_b} \|\nabla F_b(\boldsymbol{\theta}_b^{k,m}; \boldsymbol{\theta}_{-b}^{k+1})\|_2^2. \quad (\text{A.9})$$

Taking  $K \rightarrow \infty$ , and by the condition in (18), we have

$$\infty > \lim_{K \rightarrow \infty} \sum_{k=0}^K \{F_b(\boldsymbol{\theta}_b^k; \boldsymbol{\theta}_{-b}^{k+1}) - F_b(\boldsymbol{\theta}_b^{k+1}; \boldsymbol{\theta}_{-b}^{k+1})\} \geq \frac{1}{2} \alpha_b \sum_{k=0}^{\infty} \sum_{m=1}^{M_b} \|\nabla F_b(\boldsymbol{\theta}_b^{k,m}; \boldsymbol{\theta}_{-b}^{k+1})\|_2^2. \quad (\text{A.10})$$

The above inequality implies

$$\|\nabla F_b(\boldsymbol{\theta}_b^k; \boldsymbol{\theta}_{-b}^{k+1})\|_2^2 \rightarrow 0 \quad \text{as } k \rightarrow \infty. \quad (\text{A.11})$$

□

### 4 Proof for Theorem 2

We use the fact that if a function  $\phi(\mathbf{x})$  is  $\mu$ -strongly convex, then  $\phi(\mathbf{y}) \geq \phi(\mathbf{x}) + \nabla \phi(\mathbf{x})^T (\mathbf{y} - \mathbf{x}) + \frac{\mu}{2} \|\mathbf{y} - \mathbf{x}\|_2^2$  for all  $\mathbf{x}, \mathbf{y} \in \text{dom}(\phi)$ . This inequality implies

$$2\mu(\phi(\mathbf{x}) - \phi^*) \leq \|\nabla \phi(\mathbf{x})\|_2^2, \quad (\text{A.12})$$

by minimizing both sides with respect to  $\mathbf{y}$ .

By  $L_b$ -Lipschitz continuous gradient,  $\alpha_b \in (0, 1/L_b]$ , and  $\mu_b$ -strongly convexity for  $F_b$ , we have

$$\begin{aligned} F_b(\boldsymbol{\theta}_b^{k, M_b+1}; \boldsymbol{\theta}_{-b}^{k+1}) &\leq F_b(\boldsymbol{\theta}_b^{k, M_b}; \boldsymbol{\theta}_{-b}^{k+1}) - \frac{1}{2}\alpha_b \|\nabla F_b(\boldsymbol{\theta}_b^{k, M_b}; \boldsymbol{\theta}_{-b}^{k+1})\|_2^2 \\ &\leq F_b(\boldsymbol{\theta}_b^{k, M_b}; \boldsymbol{\theta}_{-b}^{k+1}) - \alpha_b \mu_b \{F_b(\boldsymbol{\theta}_b^{k, M_b}; \boldsymbol{\theta}_{-b}^{k+1}) - F_b(\boldsymbol{\theta}_b^{k, *}; \boldsymbol{\theta}_{-b}^{k+1})\}, \end{aligned} \quad (\text{A.13})$$

where the first inequality is due to (A.1) in the proof of Lemma 1 and the last inequality holds with the property of  $\mu_b$ -strongly convexity in (A.12).

Subtracting  $F_b(\boldsymbol{\theta}_b^{k, *}; \boldsymbol{\theta}_{-b}^{k+1})$  from both sides in (A.13), we obtain

$$\begin{aligned} F_b(\boldsymbol{\theta}_b^{k, M_b+1}; \boldsymbol{\theta}_{-b}^{k+1}) - F_b(\boldsymbol{\theta}_b^{k, *}; \boldsymbol{\theta}_{-b}^{k+1}) &\leq F_b(\boldsymbol{\theta}_b^{k, M_b}; \boldsymbol{\theta}_{-b}^{k+1}) - F_b(\boldsymbol{\theta}_b^{k, *}; \boldsymbol{\theta}_{-b}^{k+1}) \\ &\quad - \alpha_b \mu_b \{F_b(\boldsymbol{\theta}_b^{k, M_b}; \boldsymbol{\theta}_{-b}^{k+1}) - F_b(\boldsymbol{\theta}_b^{k, *}; \boldsymbol{\theta}_{-b}^{k+1})\} \\ &\leq (1 - \alpha_b \mu_b) \{F_b(\boldsymbol{\theta}_b^{k, M_b}; \boldsymbol{\theta}_{-b}^{k+1}) - F_b(\boldsymbol{\theta}_b^{k, *}; \boldsymbol{\theta}_{-b}^{k+1})\}. \end{aligned} \quad (\text{A.14})$$

Applying (A.14) recursively with  $F_b(\boldsymbol{\theta}_b^{k, 1}; \boldsymbol{\theta}_{-b}^{k+1}) = F_b(\boldsymbol{\theta}_b^k; \boldsymbol{\theta}_{-b}^{k+1})$  and  $F_b(\boldsymbol{\theta}_b^{k, M_b+1}; \boldsymbol{\theta}_{-b}^{k+1}) = F_b(\boldsymbol{\theta}_b^{k+1}; \boldsymbol{\theta}_{-b}^{k+1})$ , we get

$$\begin{aligned} F_b(\boldsymbol{\theta}_b^{k+1}; \boldsymbol{\theta}_{-b}^{k+1}) - F_b(\boldsymbol{\theta}_b^{k, *}; \boldsymbol{\theta}_{-b}^{k+1}) &= F_b(\boldsymbol{\theta}_b^{k, M_b+1}; \boldsymbol{\theta}_{-b}^{k+1}) - F_b(\boldsymbol{\theta}_b^{k, *}; \boldsymbol{\theta}_{-b}^{k+1}) \\ &\leq (1 - \alpha_b \mu_b) \{F_b(\boldsymbol{\theta}_b^{k, M_b}; \boldsymbol{\theta}_{-b}^{k+1}) - F_b(\boldsymbol{\theta}_b^{k, *}; \boldsymbol{\theta}_{-b}^{k+1})\} \\ &\leq (1 - \alpha_b \mu_b)^2 \{F_b(\boldsymbol{\theta}_b^{k, M_b-1}; \boldsymbol{\theta}_{-b}^{k+1}) - F_b(\boldsymbol{\theta}_b^{k, *}; \boldsymbol{\theta}_{-b}^{k+1})\} \\ &\leq \dots \\ &\leq (1 - \alpha_b \mu_b)^{M_b} \{F_b(\boldsymbol{\theta}_b^{k, 1}; \boldsymbol{\theta}_{-b}^{k+1}) - F_b(\boldsymbol{\theta}_b^{k, *}; \boldsymbol{\theta}_{-b}^{k+1})\} \\ &= (1 - \alpha_b \mu_b)^{M_b} \{F_b(\boldsymbol{\theta}_b^k; \boldsymbol{\theta}_{-b}^{k+1}) - F_b(\boldsymbol{\theta}_b^{k, *}; \boldsymbol{\theta}_{-b}^{k+1})\}. \end{aligned} \quad (\text{A.15})$$

By the conditions in (20), it follows that

$$\begin{aligned} |F_b(\boldsymbol{\theta}^{k+1}) - F_b(\boldsymbol{\theta}^*)| &\leq c_1 \{F_b(\boldsymbol{\theta}_b^{k+1}; \boldsymbol{\theta}_{-b}^{k+1}) - F_b(\boldsymbol{\theta}_b^{k, *}; \boldsymbol{\theta}_{-b}^{k+1})\} \\ &\leq c_1 (1 - \alpha_b \mu_b)^{M_b} \{F_b(\boldsymbol{\theta}_b^k; \boldsymbol{\theta}_{-b}^{k+1}) - F_b(\boldsymbol{\theta}_b^{k, *}; \boldsymbol{\theta}_{-b}^{k+1})\} \\ &\leq c_1 c_2 (1 - \alpha_b \mu_b)^{M_b} |F_b(\boldsymbol{\theta}^k) - F_b(\boldsymbol{\theta}^*)|. \end{aligned} \quad (\text{A.16})$$

Using the above inequality (A.16) recursively, we obtain

$$\begin{aligned}
|F_b(\boldsymbol{\theta}^k) - F_b(\boldsymbol{\theta}^*)| &\leq c_1 c_2 (1 - \alpha_b \mu_b)^{M_b} |F_b(\boldsymbol{\theta}^{k-1}) - F_b(\boldsymbol{\theta}^*)| \\
&\leq (c_1 c_2)^2 (1 - \alpha_b \mu_b)^{2M_b} |F_b(\boldsymbol{\theta}^{k-2}) - F_b(\boldsymbol{\theta}^*)| \\
&\leq \dots \\
&\leq (c_1 c_2)^k (1 - \alpha_b \mu_b)^{kM_b} |F_b(\boldsymbol{\theta}^0) - F_b(\boldsymbol{\theta}^*)|.
\end{aligned} \tag{A.17}$$

Letting  $\rho = c_1 c_2 (1 - \alpha_b \mu_b)^{M_b}$  with  $c_1, c_2 > 0$  and  $c_1 c_2 < \frac{1}{(1 - \alpha_b \mu_b)^{M_b}}$ , we have

$$|F_b(\boldsymbol{\theta}^k) - F_b(\boldsymbol{\theta}^*)| \leq \rho^k |F_b(\boldsymbol{\theta}^0) - F_b(\boldsymbol{\theta}^*)|. \tag{A.18}$$

The resulting inequality implies linear convergence rate, i.e.,  $\mathcal{O}(\rho^k)$ .

□

## 5 Proof for Corollary 2

With the inequalities (A.12)-(A.15) in the proof of Theorem 2 and by the conditions in (23), we have

$$\begin{aligned}
F_b(\boldsymbol{\theta}^{k+1}) - F_b(\boldsymbol{\theta}^*) &= |F_b(\boldsymbol{\theta}^{k+1}) - F_b(\boldsymbol{\theta}^*)| \\
&\leq c_1 \{F_b(\boldsymbol{\theta}_b^{k+1}; \boldsymbol{\theta}_{-b}^{k+1}) - F_b(\boldsymbol{\theta}_b^{k,*}; \boldsymbol{\theta}_{-b}^{k+1})\} \\
&\leq c_1 (1 - \alpha_b \mu_b)^{M_b} \{F_b(\boldsymbol{\theta}_b^k; \boldsymbol{\theta}_{-b}^{k+1}) - F_b(\boldsymbol{\theta}_b^{k,*}; \boldsymbol{\theta}_{-b}^{k+1})\} \\
&\leq c_1 c_2 (1 - \alpha_b \mu_b)^{M_b} |F_b(\boldsymbol{\theta}^k) - F_b(\boldsymbol{\theta}^*)| \\
&= c_1 c_2 (1 - \alpha_b \mu_b)^{M_b} \{F_b(\boldsymbol{\theta}^k) - F_b(\boldsymbol{\theta}^*)\}.
\end{aligned} \tag{A.19}$$

because Lemma 1 and the conditions in (23) imply  $F_b(\boldsymbol{\theta}^k) - F_b(\boldsymbol{\theta}^{k+1}) \geq 0$  for all  $k$ , which tells  $F_b(\boldsymbol{\theta}^k) - F_b(\boldsymbol{\theta}^*) \geq 0$ . Thus, the first and last inequality hold in (A.19).

Using the above inequality (A.19) recursively, we obtain

$$\begin{aligned}
F_b(\boldsymbol{\theta}^k) - F_b(\boldsymbol{\theta}^*) &\leq c_1 c_2 (1 - \alpha_b \mu_b)^{M_b} \{F_b(\boldsymbol{\theta}^{k-1}) - F_b(\boldsymbol{\theta}^*)\} \\
&\leq (c_1 c_2)^2 (1 - \alpha_b \mu_b)^{2M_b} \{F_b(\boldsymbol{\theta}^{k-2}) - F_b(\boldsymbol{\theta}^*)\} \\
&\leq \dots \\
&\leq (c_1 c_2)^k (1 - \alpha_b \mu_b)^{kM_b} \{F_b(\boldsymbol{\theta}^0) - F_b(\boldsymbol{\theta}^*)\}.
\end{aligned} \tag{A.20}$$

Letting  $\rho = c_1 c_2 (1 - \alpha_b \mu_b)^{M_b}$  with  $c_1, c_2 > 0$  and  $c_1 c_2 < \frac{1}{(1 - \alpha_b \mu_b)^{M_b}}$ , we have

$$F_b(\boldsymbol{\theta}^k) - F_b(\boldsymbol{\theta}^*) \leq \rho^k \{F_b(\boldsymbol{\theta}^0) - F_b(\boldsymbol{\theta}^*)\}, \tag{A.21}$$

The resulting inequality implies linear convergence rate, i.e.,  $\mathcal{O}(\rho^k)$ . Additionally, under the conditions in (23), the function of the  $b^{\text{th}}$  block is monotonically decreasing across outer iterations, and as such this yields the result of Corollary 2.  $\square$

## 6 Proof for Theorem 3

We know the fact that if a function  $\phi(\mathbf{x})$  is convex, then for all  $\mathbf{x}, \mathbf{y} \in \text{dom}(\phi)$  we have

$$\phi(\mathbf{y}) \geq \phi(\mathbf{x}) + \nabla \phi(\mathbf{x})^T (\mathbf{y} - \mathbf{x}). \tag{A.22}$$

If we rearrange the inequality (A.22), we get

$$\phi(\mathbf{x}) \leq \phi(\mathbf{y}) + \nabla \phi(\mathbf{x})^T (\mathbf{x} - \mathbf{y}). \tag{A.23}$$

By  $L_b$ -Lipschitz continuous gradient and  $\alpha_b \in (0, 1/L_b]$ , we have

$$F_b(\boldsymbol{\theta}_b^{k,m+1}; \boldsymbol{\theta}_{-b}^{k+1}) \leq F_b(\boldsymbol{\theta}_b^{k,m}; \boldsymbol{\theta}_{-b}^{k+1}) - \frac{1}{2} \alpha_b \|\nabla F_b(\boldsymbol{\theta}_b^{k,m}; \boldsymbol{\theta}_{-b}^{k+1})\|_2^2. \tag{A.24}$$

By the block-wise convexity for  $F_b$ , and from the inequality (A.24), we have

$$\begin{aligned}
F_b(\boldsymbol{\theta}_b^{k,m+1}; \boldsymbol{\theta}_{-b}^{k+1}) &\leq F_b(\boldsymbol{\theta}_b^{k,m}; \boldsymbol{\theta}_{-b}^{k+1}) - \frac{1}{2}\alpha_b \|\nabla F_b(\boldsymbol{\theta}_b^{k,m}; \boldsymbol{\theta}_{-b}^{k+1})\|_2^2 \\
&\leq F_b(\boldsymbol{\theta}_b^{k,*}; \boldsymbol{\theta}_{-b}^{k+1}) + \nabla F_b(\boldsymbol{\theta}_b^{k,m}; \boldsymbol{\theta}_{-b}^{k+1})^T (\boldsymbol{\theta}_b^{k,m} - \boldsymbol{\theta}_b^{k,*}) - \frac{1}{2}\alpha_b \|\nabla F_b(\boldsymbol{\theta}_b^{k,m}; \boldsymbol{\theta}_{-b}^{k+1})\|_2^2.
\end{aligned} \tag{A.25}$$

Subtracting  $F_b(\boldsymbol{\theta}_b^{k,*}; \boldsymbol{\theta}_{-b}^{k+1})$  on both sides in (A.25) and completing the square, we get

$$\begin{aligned}
F_b(\boldsymbol{\theta}_b^{k,m+1}; \boldsymbol{\theta}_{-b}^{k+1}) - F_b(\boldsymbol{\theta}_b^{k,*}; \boldsymbol{\theta}_{-b}^{k+1}) &\leq \nabla F_b(\boldsymbol{\theta}_b^{k,m}; \boldsymbol{\theta}_{-b}^{k+1})^T (\boldsymbol{\theta}_b^{k,m} - \boldsymbol{\theta}_b^{k,*}) - \frac{1}{2}\alpha_b \|\nabla F_b(\boldsymbol{\theta}_b^{k,m}; \boldsymbol{\theta}_{-b}^{k+1})\|_2^2 \\
&\leq \frac{1}{2\alpha_b} \{ \|\boldsymbol{\theta}_b^{k,m} - \boldsymbol{\theta}_b^{k,*}\|_2^2 - \|\boldsymbol{\theta}_b^{k,m} - \boldsymbol{\theta}_b^{k,*}\|_2^2 \\
&\quad + 2\alpha_b \nabla F_b(\boldsymbol{\theta}_b^{k,m}; \boldsymbol{\theta}_{-b}^{k+1})^T (\boldsymbol{\theta}_b^{k,m} - \boldsymbol{\theta}_b^{k,*}) - \alpha_b^2 \|\nabla F_b(\boldsymbol{\theta}_b^{k,m}; \boldsymbol{\theta}_{-b}^{k+1})\|_2^2 \} \\
&= \frac{1}{2\alpha_b} \{ \|\boldsymbol{\theta}_b^{k,m} - \boldsymbol{\theta}_b^{k,*}\|_2^2 - \|\boldsymbol{\theta}_b^{k,m} - \boldsymbol{\theta}_b^{k,*} - \alpha_b \nabla F_b(\boldsymbol{\theta}_b^{k,m}; \boldsymbol{\theta}_{-b}^{k+1})\|_2^2 \} \\
&= \frac{1}{2\alpha_b} \{ \|\boldsymbol{\theta}_b^{k,m} - \boldsymbol{\theta}_b^{k,*}\|_2^2 - \|\boldsymbol{\theta}_b^{k,m+1} - \boldsymbol{\theta}_b^{k,*}\|_2^2 \}.
\end{aligned} \tag{A.26}$$

Summing over all inner iterations,  $m = 1, 2, \dots, M_b$ , by a telescopic sum, we have

$$\begin{aligned}
M_b \{ &F_b(\boldsymbol{\theta}_b^{k,M_b+1}; \boldsymbol{\theta}_{-b}^{k+1}) - F_b(\boldsymbol{\theta}_b^{k,*}; \boldsymbol{\theta}_{-b}^{k+1}) \} \\
&\leq \{ F_b(\boldsymbol{\theta}_b^{k,2}; \boldsymbol{\theta}_{-b}^{k+1}) - F_b(\boldsymbol{\theta}_b^{k,*}; \boldsymbol{\theta}_{-b}^{k+1}) \} + \dots + \{ F_b(\boldsymbol{\theta}_b^{k,M_b+1}; \boldsymbol{\theta}_{-b}^{k+1}) - F_b(\boldsymbol{\theta}_b^{k,*}; \boldsymbol{\theta}_{-b}^{k+1}) \} \\
&\leq \frac{1}{2\alpha_b} \{ \|\boldsymbol{\theta}_b^{k,1} - \boldsymbol{\theta}_b^{k,*}\|_2^2 - \|\boldsymbol{\theta}_b^{k,2} - \boldsymbol{\theta}_b^{k,*}\|_2^2 + \dots + \|\boldsymbol{\theta}_b^{k,M_b} - \boldsymbol{\theta}_b^{k,*}\|_2^2 - \|\boldsymbol{\theta}_b^{k,M_b+1} - \boldsymbol{\theta}_b^{k,*}\|_2^2 \} \\
&\leq \frac{1}{2\alpha_b} \{ \|\boldsymbol{\theta}_b^{k,1} - \boldsymbol{\theta}_b^{k,*}\|_2^2 - \|\boldsymbol{\theta}_b^{k,M_b+1} - \boldsymbol{\theta}_b^{k,*}\|_2^2 \} \\
&= \frac{1}{2\alpha_b} \{ \|\boldsymbol{\theta}_b^k - \boldsymbol{\theta}_b^{k,*}\|_2^2 - \|\boldsymbol{\theta}_b^{k+1} - \boldsymbol{\theta}_b^{k,*}\|_2^2 \},
\end{aligned} \tag{A.27}$$

where the first inequality is satisfied because

$$F_b(\boldsymbol{\theta}_b^{k,M_b+1}; \boldsymbol{\theta}_{-b}^{k+1}) - F_b(\boldsymbol{\theta}_b^{k,*}; \boldsymbol{\theta}_{-b}^{k+1}) \leq F_b(\boldsymbol{\theta}_b^{k,m+1}; \boldsymbol{\theta}_{-b}^{k+1}) - F_b(\boldsymbol{\theta}_b^{k,*}; \boldsymbol{\theta}_{-b}^{k+1})$$

holds for all  $m$  by the fact  $F_b(\boldsymbol{\theta}_b^{k,m}; \boldsymbol{\theta}_{-b}^{k+1}) \geq F_b(\boldsymbol{\theta}_b^{k,m+1}; \boldsymbol{\theta}_{-b}^{k+1})$  from the inequality (A.24).

Rearranging the resulting inequality and using the facts that  $F_b(\boldsymbol{\theta}_b^{k+1}; \boldsymbol{\theta}_{-b}^{k+1}) = F_b(\boldsymbol{\theta}_b^{k,M_b+1}; \boldsymbol{\theta}_{-b}^{k+1})$ ,

we have

$$\begin{aligned}
F_b(\boldsymbol{\theta}_b^{k+1}; \boldsymbol{\theta}_{-b}^{k+1}) - F_b(\boldsymbol{\theta}_b^{k,*}; \boldsymbol{\theta}_{-b}^{k+1}) &= F_b(\boldsymbol{\theta}_b^{k, M_b+1}; \boldsymbol{\theta}_{-b}^{k+1}) - F_b(\boldsymbol{\theta}_b^{k,*}; \boldsymbol{\theta}_{-b}^{k+1}) \\
&\leq \frac{1}{2\alpha_b M_b} \{ \|\boldsymbol{\theta}_b^k - \boldsymbol{\theta}_b^{k,*}\|_2^2 - \|\boldsymbol{\theta}_b^{k+1} - \boldsymbol{\theta}_b^{k,*}\|_2^2 \}.
\end{aligned} \tag{A.28}$$

By the conditions in (25), it follows that

$$\begin{aligned}
|F_b(\boldsymbol{\theta}^{k+1}) - F_b(\boldsymbol{\theta}^*)| &\leq c_1 \{ F_b(\boldsymbol{\theta}_b^{k+1}; \boldsymbol{\theta}_{-b}^{k+1}) - F_b(\boldsymbol{\theta}_b^{k,*}; \boldsymbol{\theta}_{-b}^{k+1}) \} \\
&\leq \frac{c_1}{2\alpha_b M_b} \{ \|\boldsymbol{\theta}_b^k - \boldsymbol{\theta}_b^{k,*}\|_2^2 - \|\boldsymbol{\theta}_b^{k+1} - \boldsymbol{\theta}_b^{k,*}\|_2^2 \} \\
&\leq \frac{c_1}{2\alpha_b M_b} \{ \|\boldsymbol{\theta}_b^k - \boldsymbol{\theta}_b^{k,*}\|_2^2 - \|\boldsymbol{\theta}_b^{k+1} - \boldsymbol{\theta}_b^{k+1,*}\|_2^2 \}.
\end{aligned} \tag{A.29}$$

Summing over  $\tilde{l} \in \{0, 1, \dots, k-1\}$  and taking the average, by the telescopic sum, it follows that

$$\begin{aligned}
\frac{1}{k} \sum_{l=1}^k |F_b(\boldsymbol{\theta}^l) - F_b(\boldsymbol{\theta}^*)| &\leq \frac{c_1}{2\alpha_b k M_b} \sum_{\tilde{l}=0}^{k-1} \{ \|\boldsymbol{\theta}_b^{\tilde{l}} - \boldsymbol{\theta}_b^{\tilde{l},*}\|_2^2 - \|\boldsymbol{\theta}_b^{\tilde{l}+1} - \boldsymbol{\theta}_b^{\tilde{l}+1,*}\|_2^2 \} \\
&\leq \frac{c_1}{2\alpha_b k M_b} \{ \|\boldsymbol{\theta}_b^0 - \boldsymbol{\theta}_b^{0,*}\|_2^2 - \|\boldsymbol{\theta}_b^k - \boldsymbol{\theta}_b^{k,*}\|_2^2 \} \\
&\leq \frac{c_1}{2\alpha_b k M_b} \|\boldsymbol{\theta}_b^0 - \boldsymbol{\theta}_b^{0,*}\|_2^2.
\end{aligned} \tag{A.30}$$

The resulting inequality implies sublinear convergence rate, i.e.,  $\mathcal{O}(1/(kM_b))$ .

□

## 7 Proof for Corollary 3

With the inequalities (A.22)-(A.28) in the proof of Theorem 3 and by the conditions in (27) and (28), we have

$$\begin{aligned}
F_b(\boldsymbol{\theta}^{k+1}) - F_b(\boldsymbol{\theta}^*) &= |F_b(\boldsymbol{\theta}^{k+1}) - F_b(\boldsymbol{\theta}^*)| \\
&\leq c_1 \{ F_b(\boldsymbol{\theta}_b^{k+1}; \boldsymbol{\theta}_{-b}^{k+1}) - F_b(\boldsymbol{\theta}_b^{k,*}; \boldsymbol{\theta}_{-b}^{k+1}) \} \\
&\leq \frac{c_1}{2\alpha_b M_b} \{ \|\boldsymbol{\theta}_b^k - \boldsymbol{\theta}_b^{k,*}\|_2^2 - \|\boldsymbol{\theta}_b^{k+1} - \boldsymbol{\theta}_b^{k,*}\|_2^2 \} \\
&\leq \frac{c_1}{2\alpha_b M_b} \{ \|\boldsymbol{\theta}_b^k - \boldsymbol{\theta}_b^{k,*}\|_2^2 - \|\boldsymbol{\theta}_b^{k+1} - \boldsymbol{\theta}_b^{k+1,*}\|_2^2 \}.
\end{aligned} \tag{A.31}$$

because Lemma 1 and the conditions in (28) imply  $F_b(\boldsymbol{\theta}^k) - F_b(\boldsymbol{\theta}^{k+1}) \geq 0$  for all  $k$ , which tells  $F_b(\boldsymbol{\theta}^k) - F_b(\boldsymbol{\theta}^*) \geq 0$ . Thus, the first inequality holds in (A.31).

Summing over  $\tilde{l} \in \{0, 1, \dots, k-1\}$  and by the telescopic sum, it follows that

$$\begin{aligned}
F_b(\boldsymbol{\theta}^k) - F_b(\boldsymbol{\theta}^*) &\leq \frac{c_1}{2\alpha_b k M_b} \sum_{\tilde{l}=0}^{k-1} \{ \|\boldsymbol{\theta}_b^{\tilde{l}} - \boldsymbol{\theta}_b^{\tilde{l},*}\|_2^2 - \|\boldsymbol{\theta}_b^{\tilde{l}+1} - \boldsymbol{\theta}_b^{\tilde{l}+1,*}\|_2^2 \} \\
&\leq \frac{c_1}{2\alpha_b k M_b} \{ \|\boldsymbol{\theta}_b^0 - \boldsymbol{\theta}_b^{0,*}\|_2^2 - \|\boldsymbol{\theta}_b^k - \boldsymbol{\theta}_b^{k,*}\|_2^2 \} \\
&\leq \frac{c_1}{2\alpha_b k M_b} \|\boldsymbol{\theta}_b^0 - \boldsymbol{\theta}_b^{0,*}\|_2^2.
\end{aligned} \tag{A.32}$$

Under the conditions in (28), the function of the  $b^{\text{th}}$  block is monotonically decreasing across outer iterations and as such this yields the result of this corollary. It shows the sublinear rate of convergence, i.e.,  $\mathcal{O}(1/(kM_b))$ .  $\square$

## 8 Scalability Analysis

We design a new problem structure, Example IV, to show the scalability of the method in various settings such as the number of samples, the extent of block overlaps, and the number of blocks/parameters.

### Example IV

- Physical process

$$y(x) = \zeta(x) + \varepsilon,$$

with

$$\begin{aligned}
\zeta(x) &= \sum_{b=1}^{\lfloor \frac{B+1}{2} \rfloor} \mathbb{I} \left( \frac{T(4b-4+\omega)}{2B+1} \leq x < \frac{T(4b-1-\omega)}{2B+1} \right) \exp\left(\frac{x}{10}\right) \sin(x) \\
&\quad + \sum_{b=1}^{\lfloor \frac{B}{2} \rfloor} \mathbb{I} \left( \frac{T(4b-6+\omega)}{2B+1} \leq x < \frac{T(4b-3-\omega)}{2B+1} \right) \exp\left(\frac{x}{10}\right) \cos(x).
\end{aligned}$$

- Computer model

$$\begin{aligned}
\eta(x, \boldsymbol{\theta}) = & \zeta(x) + \sum_{b=1}^B \mathbb{I} \left( \frac{T(2b-1)}{2B+1} \leq x < \frac{T(2b)}{2B+1} \right) \frac{(\theta_b - b)\sqrt{x^2 - x + 1}}{5} \\
& + \sum_{b=1}^{B-1} \mathbb{I} \left( \frac{T(2b+\omega)}{2B+1} \leq x < \frac{T(2b+1-\omega)}{2B+1} \right) (\theta_b - b)(\theta_{b+1} - (b+1))\sqrt{x^2 - x + 1} \\
& + \frac{(\theta_1 - 1)\sqrt{x^2 - x + 1}}{5} \mathbb{I} \left( \frac{T\omega}{2B+1} \leq x < \frac{T}{2B+1} \right) \\
& + \frac{(\theta_B - B)\sqrt{x^2 - x + 1}}{5} \mathbb{I} \left( x \geq T \left( 1 - \frac{\omega}{2B+1} \right) \right),
\end{aligned}$$

where  $x \sim \mathcal{U}(0, T)$  and  $\varepsilon \sim \mathcal{N}(0, 0.01)$ .

By adjusting the problem parameter  $B$ , a problem can be generalized to the problem that has a different number of blocks, each of which is associated with the parameter  $\theta_b$  and the corresponding input domain  $(2b-2)T/(2B+1) \leq x < (2b+1)T/(2B+1)$  for  $b = 1, 2, \dots, B$  within the overall domain  $[0, T]$ . Here, we set  $T = 2\pi$  for all scenarios. Next,  $\omega$  quantifies the block overlapping degree for  $-0.5 \leq \omega \leq 0.5$ . We consider three cases; with  $\omega = -0.5$ , the blocks highly overlap with adjacent blocks,  $\omega = 0$  represents a weak overlapping setting, and  $\omega = 0.5$  implies no overlap. In each setting, we conduct 100 experiments, each with 8 starting points.

Tables 1-3 below show that M-BC yields consistently good results with a different sample size, degree of block overlap, and number of parameters in terms of calibration accuracy and uncertainty quantification. In particular, it demonstrates that the proposed method is suitable even for the problems with significant data overlap. Without data overlap (i.e.,  $\omega = 0.5$ ), calibrating each block of parameters does not affect other blocks. Therefore, M-BC solves each block separately and converges to a stationary point after the first outer iteration.

## 9 Example of Block Dominance Case

To demonstrate the performance when block domination occurs, we modify Example I and design a new example. Specifically, we set an input domain as  $x \in \mathcal{U}(0, 4\pi)$  with  $x < 8\pi/13$  for the first block,  $4\pi/13 \leq x < 48\pi/13$  for the second block, and  $x \geq 4\pi/13$  for the third block, each of which is associated with calibration parameters  $\theta_1$ ,  $\theta_2$ , and  $\theta_3$ , respectively. In this setting, the second block dominates the first and third blocks, and the problem structure is as follows.

Table 1: M-BC results with different sample sizes and MSE in Example IV (Note: the values inside parentheses are standard deviations)

| Ex | No. of samples ( $n$ ) | Block ( $b$ ) | True $\theta_b$ | Calibrated parameter ( $\theta_b$ ) | MSE ( $F_b$ ) | Half CI width | Coverage (%) |
|----|------------------------|---------------|-----------------|-------------------------------------|---------------|---------------|--------------|
| IV | 500                    | 1             | 1               | 1.00 (0.01)                         | 0.01 (0.00)   | 0.015 (0.001) | 96.0         |
|    |                        | 2             | 2               | 2.00 (0.00)                         | 0.01 (0.00)   | 0.008 (0.001) | 93.0         |
|    |                        | 3             | 3               | 3.00 (0.00)                         | 0.01 (0.00)   | 0.003 (0.000) | 97.0         |
|    | 1000                   | 1             | 1               | 1.00 (0.01)                         | 0.01 (0.00)   | 0.011 (0.000) | 96.0         |
|    |                        | 2             | 2               | 2.00 (0.00)                         | 0.01 (0.00)   | 0.006 (0.000) | 96.0         |
|    |                        | 3             | 3               | 3.00 (0.00)                         | 0.01 (0.00)   | 0.002 (0.000) | 97.0         |
|    | 1500                   | 1             | 1               | 1.00 (0.00)                         | 0.01 (0.00)   | 0.009 (0.000) | 97.0         |
|    |                        | 2             | 2               | 2.00 (0.00)                         | 0.01 (0.00)   | 0.005 (0.000) | 93.0         |
|    |                        | 3             | 3               | 3.00 (0.00)                         | 0.01 (0.00)   | 0.002 (0.000) | 95.0         |

Table 2: M-BC results with different block overlapping degrees in Example IV (Note: the values inside parentheses are standard deviations)

| Ex | Overlap degree ( $\omega$ ) | Block ( $b$ ) | True $\theta_b$ | Calibrated parameter ( $\theta_b$ ) | MSE ( $F_b$ ) | Half CI width | Coverage (%) |
|----|-----------------------------|---------------|-----------------|-------------------------------------|---------------|---------------|--------------|
| IV | High ( $\omega = -0.5$ )    | 1             | 1               | 1.00 (0.01)                         | 0.01 (0.00)   | 0.011 (0.000) | 96.0         |
|    |                             | 2             | 2               | 2.00 (0.00)                         | 0.01 (0.00)   | 0.006 (0.000) | 96.0         |
|    |                             | 3             | 3               | 3.00 (0.00)                         | 0.01 (0.00)   | 0.002 (0.000) | 97.0         |
|    | Low ( $\omega = 0$ )        | 1             | 1               | 1.00 (0.01)                         | 0.01 (0.00)   | 0.011 (0.000) | 96.0         |
|    |                             | 2             | 2               | 2.00 (0.00)                         | 0.01 (0.00)   | 0.006 (0.000) | 96.0         |
|    |                             | 3             | 3               | 3.00 (0.00)                         | 0.01 (0.00)   | 0.002 (0.000) | 97.0         |
|    | No ( $\omega = 0.5$ )       | 1             | 1               | 1.00 (0.01)                         | 0.01 (0.00)   | 0.012 (0.001) | 95.0         |
|    |                             | 2             | 2               | 2.00 (0.00)                         | 0.01 (0.00)   | 0.006 (0.000) | 96.0         |
|    |                             | 3             | 3               | 3.00 (0.00)                         | 0.01 (0.00)   | 0.003 (0.000) | 98.0         |

- Physical process

$$y(x) = \zeta(x) + \varepsilon,$$

with

$$\begin{aligned} \zeta(x) = \mathbb{I}\left(x < \frac{8}{13}\pi\right) \exp\left(\frac{x}{10}\right) \sin(x) + \mathbb{I}\left(\frac{4}{13}\pi \leq x < \frac{48}{13}\pi\right) \exp\left(\frac{x}{10}\right) \cos(x) \\ + \mathbb{I}\left(x \geq \frac{44}{13}\pi\right) \exp\left(\frac{x}{10}\right) \sin(x). \end{aligned}$$

- Computer model

$$\begin{aligned} \eta(x, \boldsymbol{\theta}) = \zeta(x) - \mathbb{I}\left(x < \frac{4}{13}\pi\right) \frac{(\theta_1 - 1)\sqrt{x^2 - x + 1}}{5} \\ - \mathbb{I}\left(\frac{4}{13}\pi \leq x < \frac{8}{13}\pi\right) (\theta_1 - 1)(\theta_2 - 2)\sqrt{x^2 - x + 1} - \mathbb{I}\left(\frac{8}{13}\pi \leq x < \frac{44}{13}\pi\right) \frac{(\theta_2 - 2)\sqrt{x^2 - x + 1}}{5} \\ - \mathbb{I}\left(\frac{44}{13}\pi \leq x < \frac{48}{13}\pi\right) (\theta_2 - 2)(\theta_3 - 3)\sqrt{x^2 - x + 1} - \mathbb{I}\left(x \geq \frac{48}{13}\pi\right) \frac{(\theta_3 - 3)\sqrt{x^2 - x + 1}}{5}. \end{aligned}$$

Table 3: M-BC results with a different number of blocks and parameters in Example IV (Note: the values inside parentheses are standard deviations)

| Ex | No. of blocks ( $B$ ) | Block ( $b$ ) | True $\theta_b$ | Calibrated parameter ( $\theta_b$ ) | MSE ( $F_b$ ) | Half CI width | Coverage (%) |
|----|-----------------------|---------------|-----------------|-------------------------------------|---------------|---------------|--------------|
| IV | 3                     | 1             | 1               | 1.00 (0.01)                         | 0.01 (0.00)   | 0.011 (0.000) | 96.0         |
|    |                       | 2             | 2               | 2.00 (0.00)                         | 0.01 (0.00)   | 0.006 (0.000) | 96.0         |
|    |                       | 3             | 3               | 3.00 (0.00)                         | 0.01 (0.00)   | 0.002 (0.000) | 97.0         |
|    | 5                     | 1             | 1               | 1.00 (0.01)                         | 0.01 (0.00)   | 0.016 (0.001) | 96.0         |
|    |                       | 2             | 2               | 2.00 (0.01)                         | 0.01 (0.00)   | 0.012 (0.001) | 97.0         |
|    |                       | 3             | 3               | 3.00 (0.00)                         | 0.01 (0.00)   | 0.007 (0.001) | 96.0         |
|    |                       | 4             | 4               | 4.00 (0.00)                         | 0.01 (0.00)   | 0.005 (0.000) | 96.0         |
|    |                       | 5             | 5               | 5.00 (0.00)                         | 0.01 (0.00)   | 0.003 (0.000) | 94.0         |
|    | 7                     | 1             | 1               | 1.00 (0.01)                         | 0.01 (0.00)   | 0.019 (0.001) | 94.0         |
|    |                       | 2             | 2               | 2.00 (0.01)                         | 0.01 (0.00)   | 0.019 (0.002) | 95.0         |
|    |                       | 3             | 3               | 3.00 (0.01)                         | 0.01 (0.00)   | 0.012 (0.001) | 95.0         |
|    |                       | 4             | 4               | 4.00 (0.00)                         | 0.01 (0.00)   | 0.009 (0.001) | 93.0         |
|    |                       | 5             | 5               | 5.00 (0.00)                         | 0.01 (0.00)   | 0.007 (0.000) | 91.0         |
|    |                       | 6             | 6               | 6.00 (0.00)                         | 0.01 (0.00)   | 0.005 (0.000) | 93.0         |
|    |                       | 7             | 7               | 7.00 (0.00)                         | 0.01 (0.00)   | 0.003 (0.000) | 90.0         |
|    | 9                     | 1             | 1               | 1.00 (0.01)                         | 0.01 (0.00)   | 0.021 (0.002) | 96.0         |
|    |                       | 2             | 2               | 2.00 (0.01)                         | 0.01 (0.00)   | 0.025 (0.002) | 93.0         |
|    |                       | 3             | 3               | 3.00 (0.01)                         | 0.01 (0.00)   | 0.017 (0.002) | 98.0         |
|    |                       | 4             | 4               | 4.00 (0.01)                         | 0.01 (0.00)   | 0.013 (0.001) | 90.0         |
|    |                       | 5             | 5               | 5.00 (0.00)                         | 0.01 (0.00)   | 0.010 (0.001) | 93.0         |
|    |                       | 6             | 6               | 6.00 (0.00)                         | 0.01 (0.00)   | 0.008 (0.001) | 92.0         |
|    |                       | 7             | 7               | 7.00 (0.00)                         | 0.01 (0.00)   | 0.007 (0.001) | 96.0         |
|    |                       | 8             | 8               | 8.00 (0.00)                         | 0.01 (0.00)   | 0.006 (0.000) | 95.0         |
|    |                       | 9             | 9               | 9.00 (0.00)                         | 0.01 (0.00)   | 0.003 (0.000) | 94.0         |

Table 4: Comparison results when the second block dominates the first and third blocks (Note: the values inside parentheses are standard deviations)

| Method | Block ( $b$ ) | True $\theta_b$ | Calibrated parameter ( $\theta_b$ ) | MSE ( $F_b$ ) | Half CI width | Coverage (%) |
|--------|---------------|-----------------|-------------------------------------|---------------|---------------|--------------|
| M-BC   | 1             | 1               | 1.00 (0.04)                         | 0.01 (0.00)   | 0.067 (0.007) | 90.0         |
|        | 2             | 2               | 2.00 (0.00)                         | 0.01 (0.00)   | 0.005 (0.001) | 95.0         |
|        | 3             | 3               | 3.00 (0.00)                         | 0.01 (0.00)   | 0.007 (0.000) | 95.0         |
| H-BC   | 1             | 1               | 0.99 (0.07)                         | 0.01 (0.00)   | 0.122 (0.043) | 81.1         |
|        | 2             | 2               | 2.00 (0.00)                         | 0.01 (0.00)   | 0.006 (0.000) | 100.0        |
|        | 3             | 3               | 3.00 (0.00)                         | 0.01 (0.00)   | 0.009 (0.001) | 97.3         |
| S-BC   | 1             | 1               | 0.22 (0.12)                         | 0.01 (0.00)   | 0.034 (0.014) | 0.0          |
|        | 2             | 2               | 1.81 (0.00)                         | 101.65 (7.82) | 0.000 (0.000) | 0.0          |
|        | 3             | 3               | 11.43 (0.12)                        | 0.24 (0.01)   | 0.036 (0.022) | 0.0          |

Table 4 summarizes the results. Notably, even in the block dominance setting, M-BC performs very well with respect to all performance metrics. The small standard deviations indicate that it also provides similar results in multiple experiments. It also produces narrower CIs with the coverage rate close to the nominal rate 95%. While H-BC estimates all parameters well, the half

CIs are wider than those from M-BC. Even with the wider CI for  $\theta_1$ , H-BC's coverage rate remains at 81.1%. Lastly, S-BC calibrates  $\theta_2$  relatively well, but poorly calibrate  $\theta_1$  and  $\theta_3$ . Overall, M-BC consistently provides superior performance when some blocks dominate others.
